# Supplementary material for: Preoperative cardiac risk assessment in geriatric patients with hip fractures: an orthopedic surgeons’ perspective
Source: PubMed Central journal article supplement — Osteoporos Int. 2010 Nov 6;21(Suppl 4):587–91. doi: 10.1007/s00198-010-1393-0 (PMC2974919; doi:10.1007/s00198-010-1393-0), 2010-11-06
Supplement: 198_2010_1393_MOESM1_ESM.pdf [file 198_2010_1393_MOESM1_ESM.pdf]

**QUEEN MARY HOSPITAL**

**ACUTE GERIATRIC HIP FRACTURE**  
**PRE-OPERATIVE CARDIAC CONSULTATION CHECKLIST**

This evaluation is for assessing the need to initiate pre-operative cardiac consultation for hip fractured patients.

|                   |  |                           |  |
|-------------------|--|---------------------------|--|
| <b>Names:</b>     |  | <b>Diagnosis:</b>         |  |
| <b>Sex:</b>       |  | <b>Planned operation:</b> |  |
| <b>Age:</b>       |  | <b>GA/SA:</b>             |  |
| <b>ID number:</b> |  | <b>Expected OT date:</b>  |  |
| <b>Ward/bed:</b>  |  |                           |  |

**Routine tests in orthopedic ward**

| <b>TESTS</b>                                                      | <b>√ if done</b> |
|-------------------------------------------------------------------|------------------|
| Cardiovascular examination (blood pressure, pulse, auscultation)  |                  |
| Blood tests: complete blood count, liver and renal function tests |                  |
| 12 lead electrocardiogram                                         |                  |
| Chest X-ray                                                       |                  |

**Initial assessment by orthopedic intern and/or medical officer**

|                                       | <b>√ if positive</b> |
|---------------------------------------|----------------------|
| <b>Coronary artery disease</b>        |                      |
| MI or ACS in the past 6 months        |                      |
| PCI within past 6 months              |                      |
| Unstable/ongoing angina               |                      |
| Acute ischemic changes on ECG         |                      |
| Chest pain without cardiac assessment |                      |

|                                 | <b>√ if positive</b> |
|---------------------------------|----------------------|
| <b>Heart failure</b>            |                      |
| History of heart failure        |                      |
| LVEF<45%                        |                      |
| Physical signs of heart failure |                      |
| X-ray evidence of heart failure |                      |
|                                 |                      |

|                                 |  |
|---------------------------------|--|
| <b>Structural heart disease</b> |  |
| Known AS/MS                     |  |
| Known cardiomyopathy            |  |
| Ejection systolic murmur        |  |
| DBP>110mmHg or SBP>180mmHg      |  |

|                                   |  |
|-----------------------------------|--|
| <b>Arrhythmia</b>                 |  |
| History of ventricular arrhythmia |  |
| Resting heart rate <50 bpm        |  |
| Resting heart rate >100 bpm       |  |
| High degree AV block on ECG       |  |

|                            |  |
|----------------------------|--|
| <b>Atrial fibrillation</b> |  |
| Ventricular rate >100/min  |  |
| Signs of heart failure     |  |
| Hypotension: SBP<100       |  |

|                                                  |  |
|--------------------------------------------------|--|
| <b>Cardiac medical device</b>                    |  |
| Permanent pacemaker                              |  |
| Automatic implantable cardioverter defibrillator |  |
|                                                  |  |

Please consult cardiac team if the patient has any of the following condition. Please forward this consultation form with ECG to Dr. David Siu (Division of Cardiology).

\_\_\_\_\_  
Doctor name and signature

\_\_\_\_\_  
Date
